# Supplementary material
Source: MDPI journal article supplement (https://www.mdpi.com/2624-862X/2/3/29)
Supplement: s1 [file s1]

Archive with 1 entries (1 files):
- dairy-1163771-supplementary.pdf
